# Supplementary material for: mRNA expression analysis of the SUMO pathway genes in the adult mouse retina
Source: PubMed Central journal article supplement (PMC4365491; doi:10.1242/bio.201410645), 2015-01-23
Supplement: supp_bio.201410645_bio.201510645-s1.pdf [file supp_bio.201410645_bio.201510645-s1.pdf]

**Supplementary Material**

**Victor Abad-Morales et al. doi: 10.1242/bio.201410645**

**Table S1: See supplementary webpage**
